## Membrane-Dependent Amyloid Aggregation of Human BAX $\alpha$ 9 (173-192)

David A. Price, Tayler D. Hill, Kaitlyn A. Hutson, Blaze W. Rightnowar, and Sean D. Moran\*

Department of Chemistry and Biochemistry, Southern Illinois University Carbondale, 1245 Lincoln Drive  
MC 4409, Carbondale, IL 62901.

Keywords: BAX, Apoptosis, Amyloid, 2D IR

### ABSTRACT:

Mitochondrial outer membrane permeabilization, which is a critical step in apoptosis, is initiated upon transmembrane insertion of the C-terminal  $\alpha$ -helix ( $\alpha$ 9) of the pro-apoptotic Bcl-2 family protein BAX. The isolated  $\alpha$ 9 fragment (residues 173-192) is also competent to disrupt model membranes, and the structures of its membrane-associated oligomers are of interest in understanding the potential roles of this sequence in apoptosis. Here, we used ultrafast two-dimensional infrared (2D IR) spectroscopy, thioflavin T binding, and transmission electron microscopy to show that the synthetic BAX  $\alpha$ 9 peptide ( $\alpha$ 9p) forms amyloid aggregates in solution and on the surfaces of anionic small unilamellar vesicles (SUVs). Its inherent amyloidogenicity was predicted by sequence analysis, and 2D IR spectra reveal that SUVs modulate the  $\beta$ -sheet structures of the resulting amyloid species. These results contradict prior models of transmembrane  $\alpha$ 9p pores and motivate further examination of the formation or suppression of BAX amyloids in apoptosis.

# 1. Introduction

The Bcl-2 family of proteins regulates the mitochondrial pathway of apoptosis,<sup>1-3</sup> and dysfunction of one or more members can contribute to cancers,<sup>4-6</sup> neurodegenerative diseases,<sup>7,8</sup> and developmental disorders.<sup>9,10</sup> The pro-apoptotic member BAX plays a central role in apoptosis via mitochondrial outer membrane permeabilization (MOMP), in which BAX oligomerizes on the mitochondrial outer membrane (MOM) and forms pores, which in turn release proteins such as cytochrome c and SMAC/DIABLO that promote downstream caspase activation and cell death.<sup>3,11,12</sup> The early events in this process, including the insertion of the BAX C-terminal helix ( $\alpha 9$ ) into the MOM and homodimerization, are increasingly well-characterized,<sup>1,13-16</sup> but the molecular-level structure of the oligomeric BAX pore remains unknown. Additionally, non-MOMP functions of BAX have been reported<sup>17</sup> and clusters containing hundreds to thousands of BAX monomers have been implicated in mitochondrial fission,<sup>18,19</sup> suggesting multiple modes of action that likely involve undiscovered structural rearrangements.

In prior work, Tatulian and co-workers showed that the C-terminal fragment of human BAX, spanning  $\alpha 9$  residues 173-192, is competent to permeabilize anionic liposomes<sup>20</sup> and forms  $\beta$ -rich assemblies on supported lipid bilayers (SLBs).<sup>21</sup> From these results, they proposed an octameric pore with a diameter of 20-22 Å and mixed  $\alpha/\beta$  conformation.<sup>21</sup> Secondary structure information was derived primarily from analysis of FTIR spectra using Gaussian fitting protocols. Although such methods are useful for global characterization of peptide ensembles, they are prone to error from over-fitting<sup>22</sup> and cannot easily distinguish between uniform structures and mixed states; for unambiguous assignment of spectra, specific attention must be paid to the underlying physical phenomena that influence vibrational frequencies and lineshapes. For example, low-frequency ( $\sim 1620\text{ cm}^{-1}$ ) amide I signals typically arise from excitonic coupling within extended  $\beta$ -sheets, such as those in amyloid aggregates,<sup>23-27</sup> and differs from higher-frequency ( $\geq 1630\text{ cm}^{-1}$ ) features associated with  $\beta$ -sheets in native proteins.<sup>28-30</sup> Similar features were observed in the previous data and cannot be accounted for by the small, two-stranded antiparallel  $\beta$ -sheets in the proposed BAX  $\alpha 9$  pore model.<sup>21</sup> Thus, alternative structures must be considered, and doing so may shed new light on the diverse roles of BAX and its regulation in cell survival and death.

In this study, we examined the aggregation of a synthetic human BAX  $\alpha 9$  peptide ( $\alpha 9p$ ) with the sequence H<sub>2</sub>N-VTIFVAGVLTASLTIWKKMG-CO<sub>2</sub>H. Using sequence-based structure analysis, we found that this region of the BAX sequence has a high  $\beta$ -aggregation and amyloid propensity. We then characterized  $\alpha 9p$  aggregates formed in the absence and presence of anionic small unilamellar vesicles (SUVs) using ultrafast two-dimensional infrared (2D IR) spectroscopy. This technique, which is described in detail

elsewhere,<sup>25,29,31-33</sup> provides substantial advantages over FTIR spectroscopy, including increased resolution of congested spectra, enhancement of vibrational modes with large transition dipole moments, and the ability to detect vibrational coupling through cross-peaks. Our 2D IR results, supported by thioflavin T (ThT) binding and transmission electron microscopy (TEM), show that  $\alpha$ 9p forms stable amyloid aggregates and that their formation and  $\beta$ -strand organizations are dependent on interactions with phospholipid bilayers.

## 2. Results

First, we used sequence-based structure analysis to determine  $\beta$ -aggregation or amyloid propensity of the full-length human BAX sequence (Figure 1). Four different algorithms (AGGRESCAN,<sup>34</sup> TANGO,<sup>35-37</sup> PASTA 2.0,<sup>38</sup> and MetAmyl<sup>39</sup>) showed convergent predictions of high propensities localized within the C-terminal  $\alpha$ -helix ( $\alpha$ 9) and some elevated propensities within  $\alpha$ 5 and  $\alpha$ 6, which are also known to associate

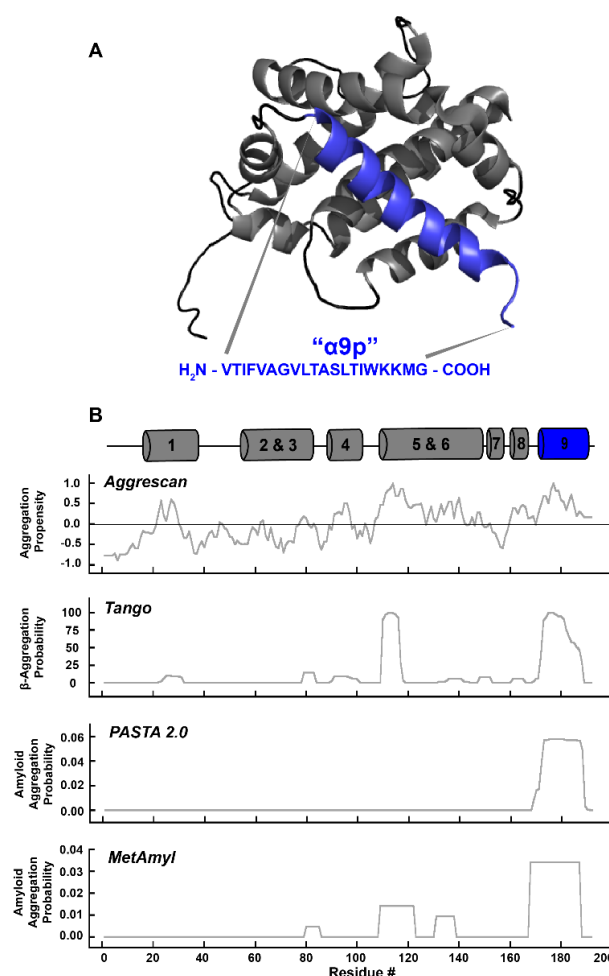

**Figure 1.** Structure and aggregation propensity of wild type human BAX. (A) Solution structure of BAX (PDB ID: 1F16)<sup>41</sup> with helices  $\alpha$ 1- $\alpha$ 8 in grey and  $\alpha$ 9 in blue, showing the sequence synthesized in this work ( $\alpha$ 9p). (B) Aggregation and amyloid propensities of full-length BAX protein via sequence analysis extracted from AGGRESCAN,<sup>34</sup> TANGO,<sup>35-37</sup> PASTA 2.0,<sup>38</sup> and MetAmyl.<sup>39</sup>

with membranes.<sup>16,40</sup> Here, the entire  $\alpha 9$  region is predicted to form  $\beta$ -sheets, in contrast with the previous  $\alpha/\beta$  pore model.<sup>21</sup> Although these predictions are broadly consistent with the ability of  $\alpha 9$ p to form  $\beta$ -strands, none of these tools account for bilayer interactions, so independent aggregation trials in the absence and presence of model membranes is required to determine their effects.

To examine the aggregation of  $\alpha 9$ p in solution, we diluted 6 mM stocks of the disaggregated peptide to a final concentration of 150  $\mu$ M into a D<sub>2</sub>O buffer containing 20 mM Tris (pD 7.5) and 100 mM NaCl, and followed the signal in the amide I region over time using rapid-scan 2D IR spectroscopy.<sup>30,33,42</sup> Immediately after dilution, two diagonal peak pairs near  $\omega_{\text{pump}} = 1645 \text{ cm}^{-1}$  and  $\omega_{\text{pump}} = 1675 \text{ cm}^{-1}$  appeared, consistent with a largely disordered initial structure comprising random coil and  $\beta$ -turns, respectively (Figure 2A).<sup>29,33,43-45</sup> Following a variable lag phase, a transition to  $\beta$ -sheets was observed by the growth of a broad diagonal peak pair between  $\omega_{\text{pump}} = 1600 - 1635 \text{ cm}^{-1}$  and concomitant reduction in the coil feature (Figure 2B). Eventually, a stationary phase is reached in which the spectrum is dominated by a narrow peak pair at  $\omega_{\text{pump}} = 1620 \text{ cm}^{-1}$  (Figure 2C). The low-frequencies of such signals arise from delocalized amide I normal modes oriented perpendicular to hydrogen-bonded  $\beta$ -strands, and the size of the resulting red shift scales with coupling constants that depend on the distances and angles between oscillators and follows an asymptotic trend with the number of strands in the  $\beta$ -sheets.<sup>24,26,27,46,47</sup> Similar kinetic behavior observed via ThT fluorescence (Figure S1A), and TEM images (Figure S2A) of late-stage (24 h) aggregates confirm the formation of amyloid fibrils as was predicted from the sequence (Figure 1). Notably, the appearance and

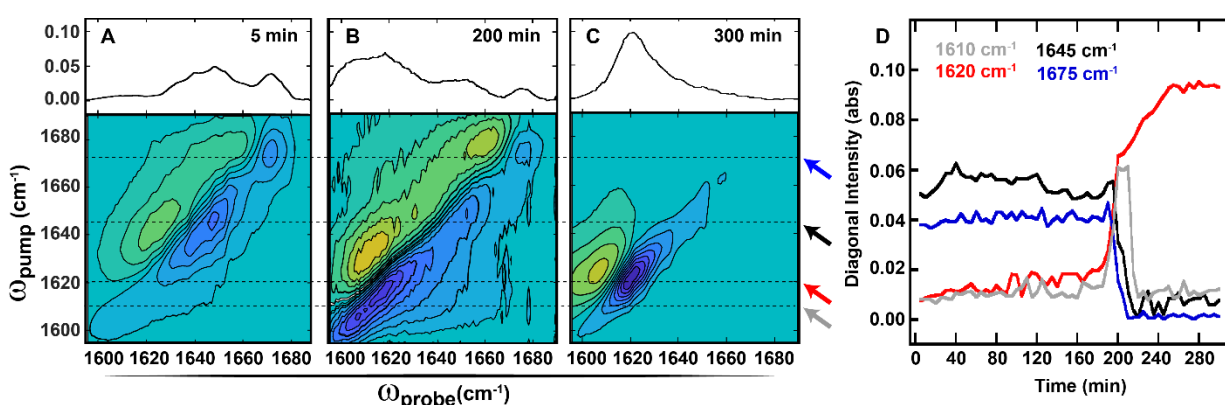

**Figure 2.** Aggregation behavior of  $\alpha 9$ p in aqueous buffer. (A-C) (Bottom) 2D IR spectra with (Top) corresponding diagonal slices for  $\alpha 9$ p in buffer at (A) early, (B) intermediate, and (C) late time points. Spectra are normalized to the largest amide I intensity in the stationary-phase (>250 min) spectrum and diagonal slices, which reflect the  $\nu(0-1)$  bleach signals, are reversed in sign for comparison to FTIR absorbance. Horizontal lines are drawn through diagonal frequencies discussed in the main text and monitored in (D). (D) Diagonal maxima at 1610  $\text{cm}^{-1}$  (grey), 1620  $\text{cm}^{-1}$  (red), 1645  $\text{cm}^{-1}$  (black), and 1675  $\text{cm}^{-1}$  (blue) during  $\alpha 9$ p aggregation. Kinetic traces are color coded as indicated by arrows in A-C (right). Additional trials are shown in Figure S3.

disappearance of the  $\sim 1610\text{ cm}^{-1}$  diagonal signal (Figure 2D) at the onset of aggregation indicates the formation of a transient  $\beta$ -rich intermediate with different coupling parameters.<sup>48</sup>

Close inspection of the infrared spectra after 24 h incubation provides additional information about the orientation of  $\beta$ -strands in these aggregates. The FTIR spectrum and 2D IR diagonal slice (Figure 3A, top), are dominated by a  $\sim 1620\text{ cm}^{-1}$  signal, and no other features are resolved above noise. However, in the 2D IR spectrum (Figure 3A, bottom) this feature (i) is accompanied by weak diagonal intensity in the coil region (ii) and near  $\omega_{\text{pump}} = 1685\text{ cm}^{-1}$  (iii). Weak cross-peaks (iv) are also observed between the high- (iii) and low-frequency (i) features, indicating that these modes exist within the same coupled array. The high-frequency feature may arise from either  $\beta$ -turns or intra-strand coupling of amide I modes, and although these are difficult to distinguish in unlabeled samples,<sup>47</sup> the low intensity is indicative of a likely parallel-stranded configuration (*vide infra*).<sup>26,45,46</sup>

Next, we performed the aggregation experiments using suspensions of 3:1 POPC:POPG SUVs in the same buffer at a peptide:lipid ratio of 1:65 (10 mM total lipids). We observed rapid precipitation immediately following dilution; ThT fluorescence increased within  $\sim 5$  minutes (Figure S1B), and the resulting precipitates contained both SUVs and networks of fibril-like structures associated with their surfaces (Figure S2B). The accelerated formation of these species precluded 2D IR kinetics experiments, but in spectra collected after 24 h we observed a strong  $\sim 1620\text{ cm}^{-1}$  signal that indicates amyloid formation (Figure 3B). In contrast to the aggregates formed in solution, this feature is broadened in both the FTIR spectrum and the 2D IR diagonal slice, and the high-frequency feature near  $1685\text{ cm}^{-1}$  is clearly resolved (Figure 3B, top). These features (i, iii) are apparent along the diagonal in the 2D IR spectrum (Figure 3B, bottom) and the signal in the coil region (ii) remains relatively weak. The increase in intensity of the high-frequency feature, and enhancement of cross-peaks (iv) compared to Figure 3A, indicates that the  $\alpha 9p$  amyloids formed on SUVs have an alternative topology that includes a strongly coupled  $\beta$ -turn, antiparallel  $\beta$ -strands, or both.<sup>23,24,46,47</sup> Additionally, the signal near  $1610\text{ cm}^{-1}$  resembles low-frequency amide I modes in mature fibrils of A $\beta$ , which were previously attributed to a sub-population of aggregates with enhanced inter-strand coupling.<sup>48</sup> However, the presence of a cross-peak (v) to the dominant excitonic mode (i) indicates that different degrees of delocalization occur within the same structures, possibly as a result of structural inhomogeneity along  $\beta$ -strands within  $\beta$ -sheets. Interestingly, a similar low-frequency signal is observed in the intermediate states during lipid-free aggregation (Figure 2B,D) so it is possible that aggregation pathways diverge upon trapping of intermediates on SUVs followed by subsequent growth of aggregates with an altered topology.

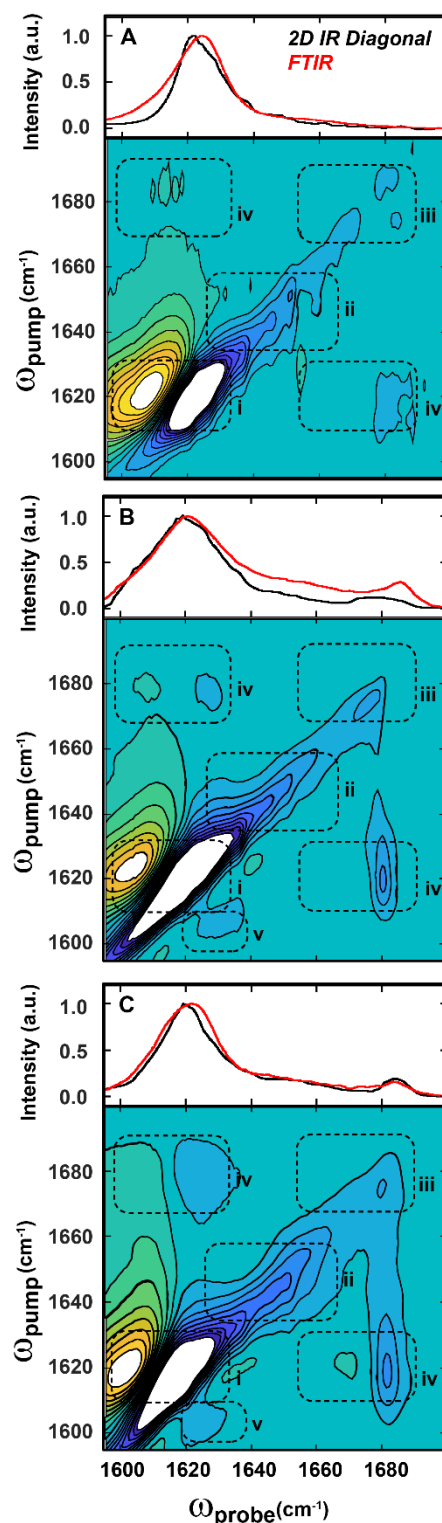

**Figure 3.** 2D IR and FTIR spectra of mature (24 h)  $\alpha$ 9p aggregates. A-C: (Bottom) 2D IR spectra with (Top) corresponding diagonal slices (black line) and FTIR spectra (red line) for mature  $\alpha$ 9p aggregates alone in solution (A), and in the presence of 10 mM (B) and 1  $\mu$ M (C) POPC:POPG SUVs. In all cases,  $\alpha$ 9p was incubated at room temperature for  $\sim$ 24 h Tris/D<sub>2</sub>O buffer (pD = 7.5) to ensure aggregation. 2D IR spectra are scaled to 50% of their respective amide I maxima and peaks in regions i-iv correspond to structural features discussed in the text.

Finally, we repeated the lipid-dependent aggregation experiments using a reduced concentration of SUVs (1  $\mu$ M total lipids) for a peptide:lipid ratio of 150:1. Under these conditions, only a small fraction of  $\alpha$ 9p molecules can interact with bilayers, and a mixture of bilayer-dependent and bilayer-independent aggregates may be expected. Again, aggregation proceeded rapidly (Figure S1C) and aggregates containing SUVs and fibrillar structures were observed (Figure S2C). The FTIR and 2D IR spectra of the aggregates (Figure 3C) reproduced the features of those collected in the presence of excess lipids (Figure 2B), indicating that amyloid aggregation of  $\alpha$ 9p proceeds to completion; surprisingly, the intensities of the high-frequency ( $\sim 1685$   $\text{cm}^{-1}$ ) diagonal feature (iii) and its associated cross-peaks (iv) were further enhanced. Thus, the predominant structure resembles that of the amyloid aggregates formed with excess lipids (Figure 3B), and the contribution of bilayer-independent aggregation is minor. These results support a model of rapid nucleation of  $\alpha$ 9p on anionic bilayers followed by amyloid aggregation from a topologically distinct state that persists in a stable conformation for at least 24 hours.

### 3. Discussion

This study provides compelling evidence through sequence analysis, infrared spectroscopy, ThT fluorescence, and TEM imaging, that the C-terminal fragment (residues 173-192) of human BAX ( $\alpha$ 9p) forms amyloid fibrils in solution and on the surfaces of anionic (POPC:POPG) SUVs. The 2D IR data reveals that while these two classes of aggregates contain extended  $\beta$ -sheets that span the majority of the residues, they differ in the organization of their  $\beta$ -strands. Specifically,  $\alpha$ 9p aggregates formed in solution are parallel-stranded and those formed on SUVs have a more complex topology. In future studies, the detailed structures of these aggregates can be determined by combining 2D IR spectroscopy with isotope editing in order to reveal contacts between specific peptide bonds.<sup>47,49-51</sup>

By comparing our results to those of Tatulian and co-workers, we gain new insight into the structures of BAX  $\alpha$ 9p assemblies formed on model phospholipid bilayers. First, we consider the similarities between the two sets of results. Our FTIR and 2D IR spectra reproduce the strong signal at  $\sim 1620$   $\text{cm}^{-1}$ , which is well-known to arise from vibrational excitonic coupling in extended  $\beta$ -sheets<sup>23,26,27,31,46</sup> and was likely mis-assigned to two-stranded structures in the  $\alpha/\beta$  pore model.<sup>21</sup> In the 2D IR spectra, we also resolve previously unassigned signals at  $\sim 1610$   $\text{cm}^{-1}$  and  $\sim 1685$   $\text{cm}^{-1}$ , and cross-peaks show that they arise from coupled modes in the same assemblies. The latter high-frequency mode is consistent with the presence of antiparallel  $\beta$ -strands, albeit within amyloid aggregates instead of oligomeric transmembrane pores. The primary difference in our results is a reduced contribution of  $\alpha$ -helices and disordered structures, which appear



between 1635 – 1665  $\text{cm}^{-1}$ .<sup>44</sup> It is possible that some differences in membrane composition, curvature, and stability could bias the system towards a stable transmembrane structure, but this does not account for the presence of the aforementioned excitonic signal in spectra of SLB-associated  $\alpha 9\text{p}$ .<sup>21</sup> Instead, the pore model was more likely based on a mixture of states, including pre-amyloid and amyloid structures (cf. Figure 2A-C) that were unresolvable by FTIR. Although the final stable state of  $\alpha 9\text{p}$  is clearly amyloid in nature, this does not necessarily preclude the formation of transient pores along the bilayer-dependent aggregation pathway. Such kinetic details may become accessible via 2D IR with increased scan rates and fast mixing techniques.<sup>52,53</sup>

To date, structural studies of BAX have focused on the early events in MOMP, where transmembrane insertion of  $\alpha 9$ , homodimerization, and oligomerization are well-established.<sup>1,11-16</sup> The results presented here show that the same region of sequence is highly amyloidogenic, and the resulting structures are modulated by model phospholipid bilayers. Clearly, more experiments will be required to establish whether the same phenomena occur in full-length BAX upon its interactions with mitochondrial membranes. However, the strong amyloid propensity of  $\alpha 9\text{p}$  suggests that the amyloid state of BAX is accessible under physiological conditions and must be considered in any detailed mechanistic model of apoptosis. Importantly, our observations generate new hypotheses regarding the possible functions of BAX. One possibility is that the amyloid pathway is suppressed *in vivo* by specific interactions of  $\alpha 9$  with other regions of the BAX sequence, by structural preferences imposed by the MOM itself, or by other proteins involved in MOMP. Here, misfolding and amyloid aggregation of BAX would alter the balance of pro-apoptotic and anti-apoptotic Bcl-2 family proteins, thus perturbing pathways that regulate cell survival and death. Another possibility is that its amyloid-like structures (including intermediates) are directly involved in cell death as mitochondrial analogs of cytotoxic amyloid peptides such as  $\text{A}\beta$ ;<sup>54-56</sup> such structures could evolve from BAX pores,<sup>11,12</sup> occur in late-stage BAX clusters,<sup>18,19</sup> or form within non-canonical pathways of mitochondrial disruption and dysfunction.<sup>17</sup> The recent observation that full-length BAX is incorporated into fibrils formed by the anti-apoptotic peptide humanin suggests that such heteroamyloids could act to suppress BAX function via sequestration in an inactive form.<sup>57,58</sup> In either case, our results motivate the continued examination of the amyloid state of BAX *in vitro* and *in vivo* to further understand the molecular mechanisms of apoptosis.



## 4. Materials and Methods

### 4.1. Sequence analysis.

The publicly available aggregation prediction servers AGGRESCAN ([bioinf.uab.es/aggrescan](http://bioinf.uab.es/aggrescan)),<sup>34</sup> TANGO ([tango.crg.es](http://tango.crg.es)),<sup>35-37</sup> PASTA 2.0 ([protein.bio.unipd.it/pasta2](http://protein.bio.unipd.it/pasta2)),<sup>38</sup> and MetAmyl ([metamyl.genouest.org](http://metamyl.genouest.org))<sup>39</sup> were used to predict the aggregation propensities across the full-length human BAX protein (UniProt Accession ID: Q07812, PDB ID: 1F16, Figure S4). The AGGRESCAN server requires no input parameters outside of the amino acid sequence. For TANGO analysis, the option “no protection” was used for both the N- and C-termini. The pH, temperature, ionic strength, and concentration were set to 7.5, 298.15 K, 0.120 M, and 0.000150 M, respectively, to reflect solution conditions used for BAX  $\alpha$ 9 peptide experiments throughout this work. For PASTA 2.0 analysis, the Region (90% specificity) threshold was used which corresponds to top pairing energies and an energy threshold of 22 and  $< -2.8$  PEU (PEU, 1.0 PASTA Energy Unit = 1.192 kcal/mol), respectively, which allow for high confidence in aggregation region detection. In the MetAmyl analysis, the “best global accuracy” threshold was applied for the BAX aggregation prediction.

### 4.2. Peptide synthesis and purification.

The BAX  $\alpha$ 9 peptide ( $\alpha$ 9p)  $\text{H}_2\text{N-VTIFVAGVLTASLTIWKKMG-CO}_2\text{H}$  was synthesized in the solid state using standard fluorenylmethyloxycarbonyl (Fmoc) chemistry on Gly-Wang resin using an AAPPTec FOCUS XC automated peptide synthesizer. The product was purified by reverse-phase HPLC using a Hitachi LaChrom Elite system equipped with a Vydac semi-preparative C4 column. Acetonitrile and water, supplemented with 0.1% 2,2,2-trifluoroacetic acid (TFA) and 10% 2,2,2-trifluoroethanol (TFE), were used as the mobile phase for HPLC purification, with a linear gradient of 30% to 37% acetonitrile:TFE:TFA over 60 min. The pure peptide was confirmed using a Bruker Daltonic MALDI-TOF Mass Spectrometer (Figure S5).

### 4.3. Sample preparation.

Purified  $\alpha$ 9p was resuspended in deuterated hexafluoroisopropanol (d-HFIP) to deuterate exchangeable sites and promote disaggregation of peptides.<sup>27</sup> Concentrated (6 mM) peptide/d-HFIP solution was diluted into Tris-buffered (20 mM Tris, 100 mM NaCl, pD/pH = 7.5)  $\text{D}_2\text{O}$  or  $\text{H}_2\text{O}$ , either with or without lipid vesicles, to a final peptide concentration of 150  $\mu\text{M}$  and incubated at room temperature for  $\sim 24$  h to ensure aggregation unless otherwise noted. For SUV preparation, chloroform solutions of 1-palmitoyl-2-oleoyl-sn-glycero-3-phosphocholine (POPC) and 1-palmitoyl-2-oleoyl-sn-glycero-3-phosphoglycerol (POPG) (Avanti Polar Lipids, Alabaster, AL) were combined in a ratio of 3:1 POPC:POPG and dried under vacuum. Lipid films were resuspended to 10 mM lipid concentration in the appropriate buffer and mixed vigorously

for 1 h. SUVs were prepared by sonicating the resulting suspensions for 10 min.<sup>59</sup> For experiments at 10 mM lipids, SUV suspensions were used as prepared and for experiments at low lipid concentrations SUV suspensions were diluted into identical buffers to the desired concentration.

#### **4.4. Infrared spectroscopy.**

Sample and background FTIR spectra were collected with 128 scans at room temperature using a Jasco 6800 FTIR spectrometer equipped with a PIKE Technologies MIRacle ATR Accessory and DTGS detector with a resolution of 1 cm<sup>-1</sup>. Buffer backgrounds were subtracted and residual baseline correction was performed in MATLAB using low-order polynomials. For 2D IR spectroscopy, ~17 μJ mid-IR pulses with (~100 fs) were directed into a 2DQuick Array spectrometer (Phasetech Spectroscopy, Inc., Madison, WI) equipped with a 128 x 128 pixel MCT array detector as previously described.<sup>60</sup> All spectra were collected with perpendicular pump and probe polarizations and four-frame phase cycling to reduce interference from pump scatter. Probe frequencies were calibrated to the absorbances of 4-nitrobenzaldehyde in dichloromethane (1605, 1676, and 1709 cm<sup>-1</sup>), used as an external standard. All instruments were purged continuously with dry air to minimize contributions from water vapor. 2D IR spectra were processed in MATLAB using low-order polynomial background correction and Hamming apodization.<sup>49</sup>

#### **4.5. Thioflavin T Fluorescence.**

For Thioflavin T experiments, concentrated peptide/d-HFIP solutions were diluted directly into a quartz cuvette containing Tris-buffer, ThT (25 μM) and SUVs. Emission spectra between 450 – 600 nm were collected in 30 s intervals using a Cary Eclipse spectrofluorometer ( $\lambda_{\text{ex}}$  = 440 nm), and emission intensities at 480 nm were monitored over time.

#### **4.6. Transmission Electron Microscopy.**

For TEM experiments, 5 μL of buffered α9p samples, with or without SUVs, were deposited onto formvar coated nickel grids (Electron Microscopy Sciences, Hatfield, PA) and allowed to incubate for 5 min at room temperature. Excess buffer was removed by blotting, and the grids were dried in air for 10 min and stained with 2% Uranyl Acetate. TEM images were collected with a Hitachi H-7650 Transmission Electron Microscope using an acceleration voltage of 60 kV.

## **Corresponding Author**

\*Sean D. Moran, *Department of Chemistry and Biochemistry, Southern Illinois University, 1245 Lincoln Drive, Carbondale, IL 62901, USA*; Email: smoran@chem.siu.edu

## **Funding:**

The Transmission Electron Microscope used in this work was purchased through a grant from National Science Foundation (DEB-0521177). This research is in part supported by the SIU Research Enriched Academic Challenge (REACH) program awarded to K.A.H. and B.W.R. This material is based upon work supported by the National Science Foundation Graduate Research Fellowship under Grant No. (1545870) to T.D.H.

## **Acknowledgements:**

The authors wish to thank the Southern Illinois University IMAGE center for assistance in the collection of the TEM images. The authors wish to thank the SIU Mass Spectrometry Facility director Dr. Mary Kinsel for training and assistance pertaining to the Bruker Daltonic MALDI TOFMS results included in this publication.

## **Notes:**

The authors declare no competing financial interest.

## REFERENCES

1. Youle RJ, Strasser A (2008) The BCL-2 protein family: opposing activities that mediate cell death. *Nat. Rev. Mol. Cell Biol.* 9:47-59.
2. Chipuk JE, Moldoveanu T, Llambi F, Parsons MJ, Green DR (2010) The BCL-2 family reunion. *Mol. Cell* 37:299-310.
3. Gillies LA, Kuwana T (2014) Apoptosis Regulation at the Mitochondrial Outer Membrane. *J. Cell. Biochem.* 115:632-640.
4. Xin M, Li R, Xie M, Park D, Owonikoko TK, Sica GL, Corsino PE, Zhou J, Ding C, White MA, Magis AT, Ramalingam SS, Curran WJ, Khuri FR, Deng X (2014) Small-molecule Bax agonists for cancer therapy. *Nat. Commun.* 5:4935-4935.
5. Adams JM, Cory S (2018) The BCL-2 arbiters of apoptosis and their growing role as cancer targets. *Cell Death Differ.* 25:27-36.
6. Warren CFA, Wong-Brown MW, Bowden NA (2019) BCL-2 family isoforms in apoptosis and cancer. *Cell Death Dis.* 10:177.
7. Akhtar RS, Ness JM, Roth KA (2004) Bcl-2 family regulation of neuronal development and neurodegeneration. *Biochim. Biophys. Acta* 1644:189-203.
8. Shacka JJ, Roth KA (2005) Regulation of neuronal cell death and neurodegeneration by members of the Bcl-2 family: therapeutic implications. *CNS Neurol. Disord. Drug Targets* 4:25-39.
9. Kollek M, Müller A, Egle A, Erlacher M (2016) Bcl-2 proteins in development, health, and disease of the hematopoietic system. *FEBS J.* 283:2779-2810.
10. Opferman JT, Kothari A (2018) Anti-apoptotic BCL-2 family members in development. *Cell Death Differ.* 25:37-45.
11. Cosentino K, Garcia-Saez AJ (2017) Bax and Bak Pores: Are We Closing the Circle? *Trends Cell Biol.* 27:266-275.
12. Uren RT, Iyer S, Kluck RM (2017) Pore formation by dimeric Bak and Bax: an unusual pore? *Philos. Trans. R Soc. Lond. B Biol. Sci.* 372:20160218.
13. Westphal D, Dewson G, Czabotar PE, Kluck RM (2011) Molecular biology of Bax and Bak activation and action. *Biochim. Biophys. Acta* 1813:521-531.
14. Bleicken S, Jeschke G, Stegmüller C, Salvador-Gallego R, García-Sáez AJ, Bordignon E (2014) Structural model of active Bax at the membrane. *Mol. Cell* 56:496-505.
15. Gahl RF, He Y, Yu S, Tjandra N (2014) Conformational rearrangements in the pro-apoptotic protein, Bax, as it inserts into mitochondria: a cellular death switch. *J. Biol. Chem.* 289:32871-32882.
16. Westphal D, Dewson G, Menard M, Frederick P, Iyer S, Bartolo R, Gibson L, Czabotar PE, Smith BJ, Adams JM, Kluck RM (2014) Apoptotic pore formation is associated with in-plane insertion of Bak or Bax central helices into the mitochondrial outer membrane. *Proc. Natl. Acad. Sci. U.S.A.* 111:E4076-4085.
17. Chong SJF, Marchi S, Petroni G, Kroemer G, Galluzzi L, Pervaiz S (2020) Noncanonical Cell Fate Regulation by Bcl-2 Proteins. *Trends Cell Biol.* 30:537-555.
18. Karbowski M, Lee Y-J, Gaume B, Jeong S-Y, Frank S, Nechushtan A, Santel A, Fuller M, Smith CL, Youle RJ (2002) Spatial and temporal association of Bax with mitochondrial fission sites, Drp1, and Mfn2 during apoptosis. *J. Cell Biol.* 159:931-938.

19. Nasu Y, Benke A, Arakawa S, Yoshida GJ, Kawamura G, Manley S, Shimizu S, Ozawa T (2016) In Situ Characterization of Bak Clusters Responsible for Cell Death Using Single Molecule Localization Microscopy. *Sci. Rep.* 6:27505.
20. Garg P, Nemec KN, Khaled AR, Tatulian SA (2013) Transmembrane pore formation by the carboxyl terminus of Bax protein. *Biochim. Biophys. Acta* 1828:732-742.
21. Tatulian SA, Garg P, Nemec KN, Chen B, Khaled AR (2012) Molecular Basis for Membrane Pore Formation by Bax Protein Carboxyl Terminus. *Biochemistry* 51:9406-9419.
22. Hawkins DM (2004) The Problem of Overfitting. *J. Chem. Inform. Comput. Sci.* 44:1-12.
23. Cheatum CM, Tokmakoff A, Knoester J (2004) Signatures of  $\beta$ -sheet secondary structures in linear and two-dimensional infrared spectroscopy. *J. Chem. Phys.* 120:8201-8215.
24. Demirdöven N, Cheatum CM, Chung HS, Khalil M, Knoester J, Tokmakoff A (2004) Two-Dimensional Infrared Spectroscopy of Antiparallel  $\beta$ -Sheet Secondary Structure. *J. Am. Chem. Soc.* 126:7981-7990.
25. Shim S-H, Strasfeld DB, Ling YL, Zanni MT (2007) Automated 2D IR spectroscopy using a mid-IR pulse shaper and application of this technology to the human islet amyloid polypeptide. *Proc. Natl. Acad. Sci. U.S.A.* 104:14197-14202.
26. Moran SD, Zanni MT (2014) How to Get Insight into Amyloid Structure and Formation from Infrared Spectroscopy. *J. Phys. Chem. Lett.* 5:1984-1993.
27. Lomont JP, Ostrander JS, Ho J-J, Petti MK, Zanni MT (2017) Not All  $\beta$ -Sheets Are the Same: Amyloid Infrared Spectra, Transition Dipole Strengths, and Couplings Investigated by 2D IR Spectroscopy. *J. Phys. Chem. B* 121:8935-8945.
28. Zandomenighi G, Krebs MRH, McCammon MG, Fändrich M (2004) FTIR reveals structural differences between native  $\beta$ -sheet proteins and amyloid fibrils. *Prot. Sci.* 13:3314-3321.
29. Baiz CR, Peng CS, Reppert ME, Jones KC, Tokmakoff A (2012) Coherent two-dimensional infrared spectroscopy: Quantitative analysis of protein secondary structure in solution. *Analyst* 137:1793-1799.
30. Moran SD, Woys AM, Buchanan LE, Bixby E, Decatur SM, Zanni MT (2012) Two-dimensional IR spectroscopy and segmental  $^{13}\text{C}$  labeling reveals the domain structure of human  $\gamma\text{D}$ -crystallin amyloid fibrils. *Proc. Natl. Acad. Sci. U.S.A.* 109:3329-3334.
31. Kim YS, Hochstrasser RM (2009) Applications of 2D IR Spectroscopy to Peptides, Proteins, and Hydrogen-Bond Dynamics. *J. Phys. Chem. B* 113:8231-8251.
32. Hamm P, Zanni M. 2011. *Concepts and Methods of 2D Infrared Spectroscopy*, Cambridge University Press, Cambridge.
33. Ghosh A, Ostrander JS, Zanni MT (2017) Watching Proteins Wiggle: Mapping Structures with Two-Dimensional Infrared Spectroscopy. *Chem. Rev.* 117:10726-10759.
34. de Groot NS, Pallarés I, Avilés FX, Vendrell J, Ventura S (2005) Prediction of "hot spots" of aggregation in disease-linked polypeptides. *BMC Struct. Biol.* 5:18.
35. Fernandez-Escamilla AM, Rousseau F, Schymkowitz J, Serrano L (2004) Prediction of sequence-dependent and mutational effects on the aggregation of peptides and proteins. *Nat. Biotechnol.* 22:1302-1306.
36. Linding R, Schymkowitz J, Rousseau F, Diella F, Serrano L (2004) A comparative study of the relationship between protein structure and beta-aggregation in globular and intrinsically disordered proteins. *J. Mol. Biol.* 342:345-353.

37. Rousseau F, Schymkowitz J, Serrano L (2006) Protein aggregation and amyloidosis: confusion of the kinds? *Curr. Opin. Struct. Biol.* 16:118-126.
38. Walsh I, Seno F, Tosatto SCE, Trovato A (2014) PASTA 2.0: an improved server for protein aggregation prediction. *Nucleic Acids Res.* 42:W301-W307.
39. Emily M, Talvas A, Delamarche C (2013) MetAmyl: A METa-Predictor for AMYLoid Proteins. *PLOS ONE* 8:e79722.
40. García-Sáez AJ, Coraiola M, Serra MD, Mingarro I, Müller P, Salgado J (2006) Peptides corresponding to helices 5 and 6 of Bax can independently form large lipid pores. *FEBS J.* 273:971-981.
41. Suzuki M, Youle RJ, Tjandra N (2000) Structure of Bax: Coregulation of Dimer Formation and Intracellular Localization. *Cell* 103:645-654.
42. Middleton CT, Woys AM, Mukherjee SS, Zanni MT (2010) Residue-specific structural kinetics of proteins through the union of isotope labeling, mid-IR pulse shaping, and coherent 2D IR spectroscopy. *Methods* 52:12-22.
43. Choi J-H, Kim J-S, Cho M (2005) Amide I vibrational circular dichroism of polypeptides: Generalized fragmentation approximation method. *J. Chem. Phys.* 122:174903.
44. Barth A (2007) Infrared spectroscopy of proteins. *Biochim. Biophys. Acta* 1767:1073-1101.
45. Ganim Z, Chung HS, Smith AW, DeFlores LP, Jones KC, Tokmakoff A (2008) Amide I Two-Dimensional Infrared Spectroscopy of Proteins. *Acc. Chem. Res.* 41:432-441.
46. Hahn S, Kim SS, Lee C, Cho M (2005) Characteristic two-dimensional IR spectroscopic features of antiparallel and parallel beta-sheet polypeptides: simulation studies. *J Chem Phys* 123:084905.
47. Strasfeld DB, Ling YL, Gupta R, Raleigh DP, Zanni MT (2009) Strategies for Extracting Structural Information from 2D IR Spectroscopy of Amyloid: Application to Islet Amyloid Polypeptide. *J. Phys. Chem. B* 113:15679-15691.
48. Lomont JP, Rich KL, Maj M, Ho J-J, Ostrander JS, Zanni MT (2018) Spectroscopic Signature for Stable  $\beta$ -Amyloid Fibrils versus  $\beta$ -Sheet-Rich Oligomers. *J. Phys. Chem. B* 122:144-153.
49. Middleton CT, Woys AM, Mukherjee SS, Zanni MT (2010) Residue-specific structural kinetics of proteins through the union of isotope labeling, mid-IR pulse shaping, and coherent 2D IR spectroscopy. *Methods* 52:12-22.
50. Woys AM, Almeida AM, Wang L, Chiu C-C, McGovern M, de Pablo JJ, Skinner JL, Gellman SH, Zanni MT (2012) Parallel  $\beta$ -Sheet Vibrational Couplings Revealed by 2D IR Spectroscopy of an Isotopically Labeled Macrocyclic: Quantitative Benchmark for the Interpretation of Amyloid and Protein Infrared Spectra. *J. Am. Chem. Soc.* 134:19118-19128.
51. Buchanan LE, Carr JK, Fluitt AM, Hoganson AJ, Moran SD, de Pablo JJ, Skinner JL, Zanni MT (2014) Structural motif of polyglutamine amyloid fibrils discerned with mixed-isotope infrared spectroscopy. *Proc. Natl.Acad. Sci. U.S.A.* 111:5796-5801.
52. Luther BM, Tracy KM, Gerrity M, Brown S, Krummel AT (2016) 2D IR spectroscopy at 100 kHz utilizing a Mid-IR OPCPA laser source. *Opt. Express* 24:4117-4127.
53. Tracy KM, Barich MV, Carver CL, Luther BM, Krummel AT (2016) High-Throughput Two-Dimensional Infrared (2D IR) Spectroscopy Achieved by Interfacing Microfluidic Technology with a High Repetition Rate 2D IR Spectrometer. *J. Phys. Chem. Lett.* 7:4865-4870.
54. Murphy MP, LeVine H, 3rd (2010) Alzheimer's disease and the amyloid-beta peptide. *J. Alzheimers Dis.* 19:311-323.

55. Eisenberg D, Jucker M (2012) The amyloid state of proteins in human diseases. *Cell* 148:1188-1203.
56. Jang H, Connelly L, Arce FT, Ramachandran S, Lal R, Kagan BL, Nussinov R (2013) Alzheimer's disease: which type of amyloid-preventing drug agents to employ? *Phys. Chem. Chem. Phys.* 15:8868-8877.
57. Guo B, Zhai D, Cabezas E, Welsh K, Nouraini S, Satterthwait AC, Reed JC (2003) Humanin peptide suppresses apoptosis by interfering with Bax activation. *Nature* 423:456-461.
58. Morris DL, Kastner DW, Johnson S, Strub MP, He Y, Bleck CKE, Lee DY, Tjandra N (2019) Humanin induces conformational changes in the apoptosis regulator BAX and sequesters it into fibers, preventing mitochondrial outer-membrane permeabilization. *J. Biol. Chem.* 294:19055-19065.
59. Akbarzadeh A, Rezaei-Sadabady R, Davaran S, Joo SW, Zarghami N, Hanifehpour Y, Samiei M, Kouhi M, Nejati-Koshki K (2013) Liposome: classification, preparation, and applications. *Nanoscale Res. Lett.* 8:102.
60. Price DA, Kartje ZJ, Hughes JA, Hill TD, Loth TM, Watts JK, Gagnon KT, Moran SD (2020) Infrared Spectroscopy Reveals the Preferred Motif Size and Local Disorder in Parallel Stranded DNA G-Quadruplexes. *Chembiochem* 21:2792-2804.
